# Supplementary material for: Granulocyte-Colony Stimulating Factor (G-CSF) Improves Motor Recovery in the Rat Impactor Model for Spinal Cord Injury
Source: PubMed Central journal article supplement (PMC3257226; doi:10.1371/journal.pone.0029880), 2012-01-12
Supplement: pone.0029880.s001.pdf [file pone.0029880.s001.pdf]

| Paw Position |                   | Movement |           |       |             |       |         | Hindlimb-Forelimb coordination |          |             | Sagittal balance |     | Tail |    |
|--------------|-------------------|----------|-----------|-------|-------------|-------|---------|--------------------------------|----------|-------------|------------------|-----|------|----|
| 90° to trunk | Parallel to trunk | no       | one joint |       | > one joint |       |         | no                             | yes      |             | no               | yes | down | up |
|              |                   |          | slight    | extr. | slight      | extr. | occass. |                                | consist. |             |                  |     |      |    |
|              |                   |          |           |       |             |       |         |                                |          | Cor.balance |                  |     |      |    |
| 0            | 1                 | 0        | 1         | 2     | 3           | 4     | 5       | 0                              | 1        | 2           | 0                | 1   | 0    | 1  |
